# Supplementary material for: A comparison of genotyping arrays
Source: PubMed Central journal article supplement (PMC8560858; doi:10.1038/s41431-021-00917-7), 2021-06-18

# HapMap EUR samples (N=90)

## A. Ultra-rare (MAF<0.5%)

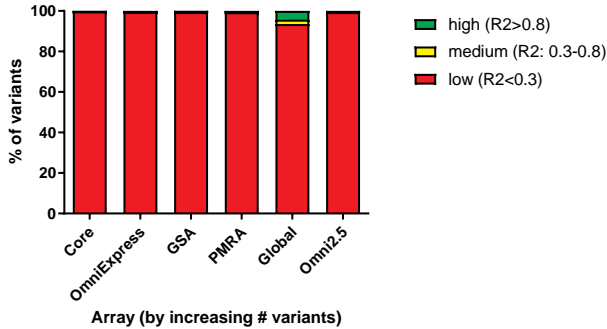

## B. Rare (MAF0.5-1%)

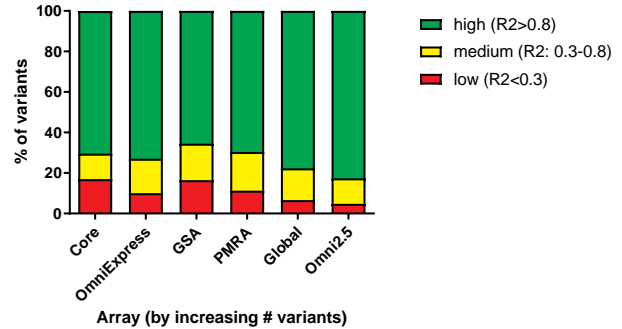

## C. Low-frequency (MAF1-5%)

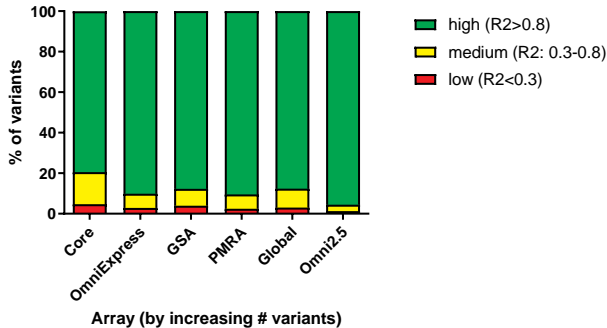

## D. Common (MAF>5%)

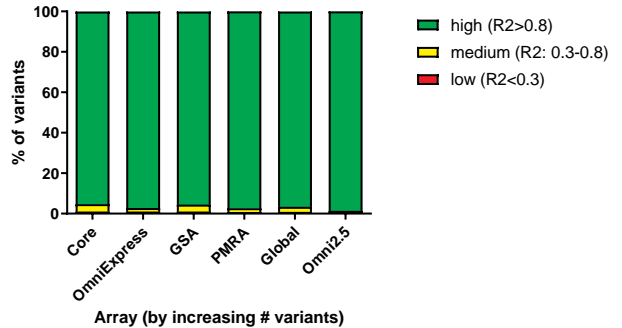

Supplement: 41431_2021_917_MOESM4_ESM.pdf [file 41431_2021_917_MOESM4_ESM.pdf]
