# Supplementary material for: A comparison of genotyping arrays
Source: PubMed Central journal article supplement (PMC8560858; doi:10.1038/s41431-021-00917-7), 2021-06-18

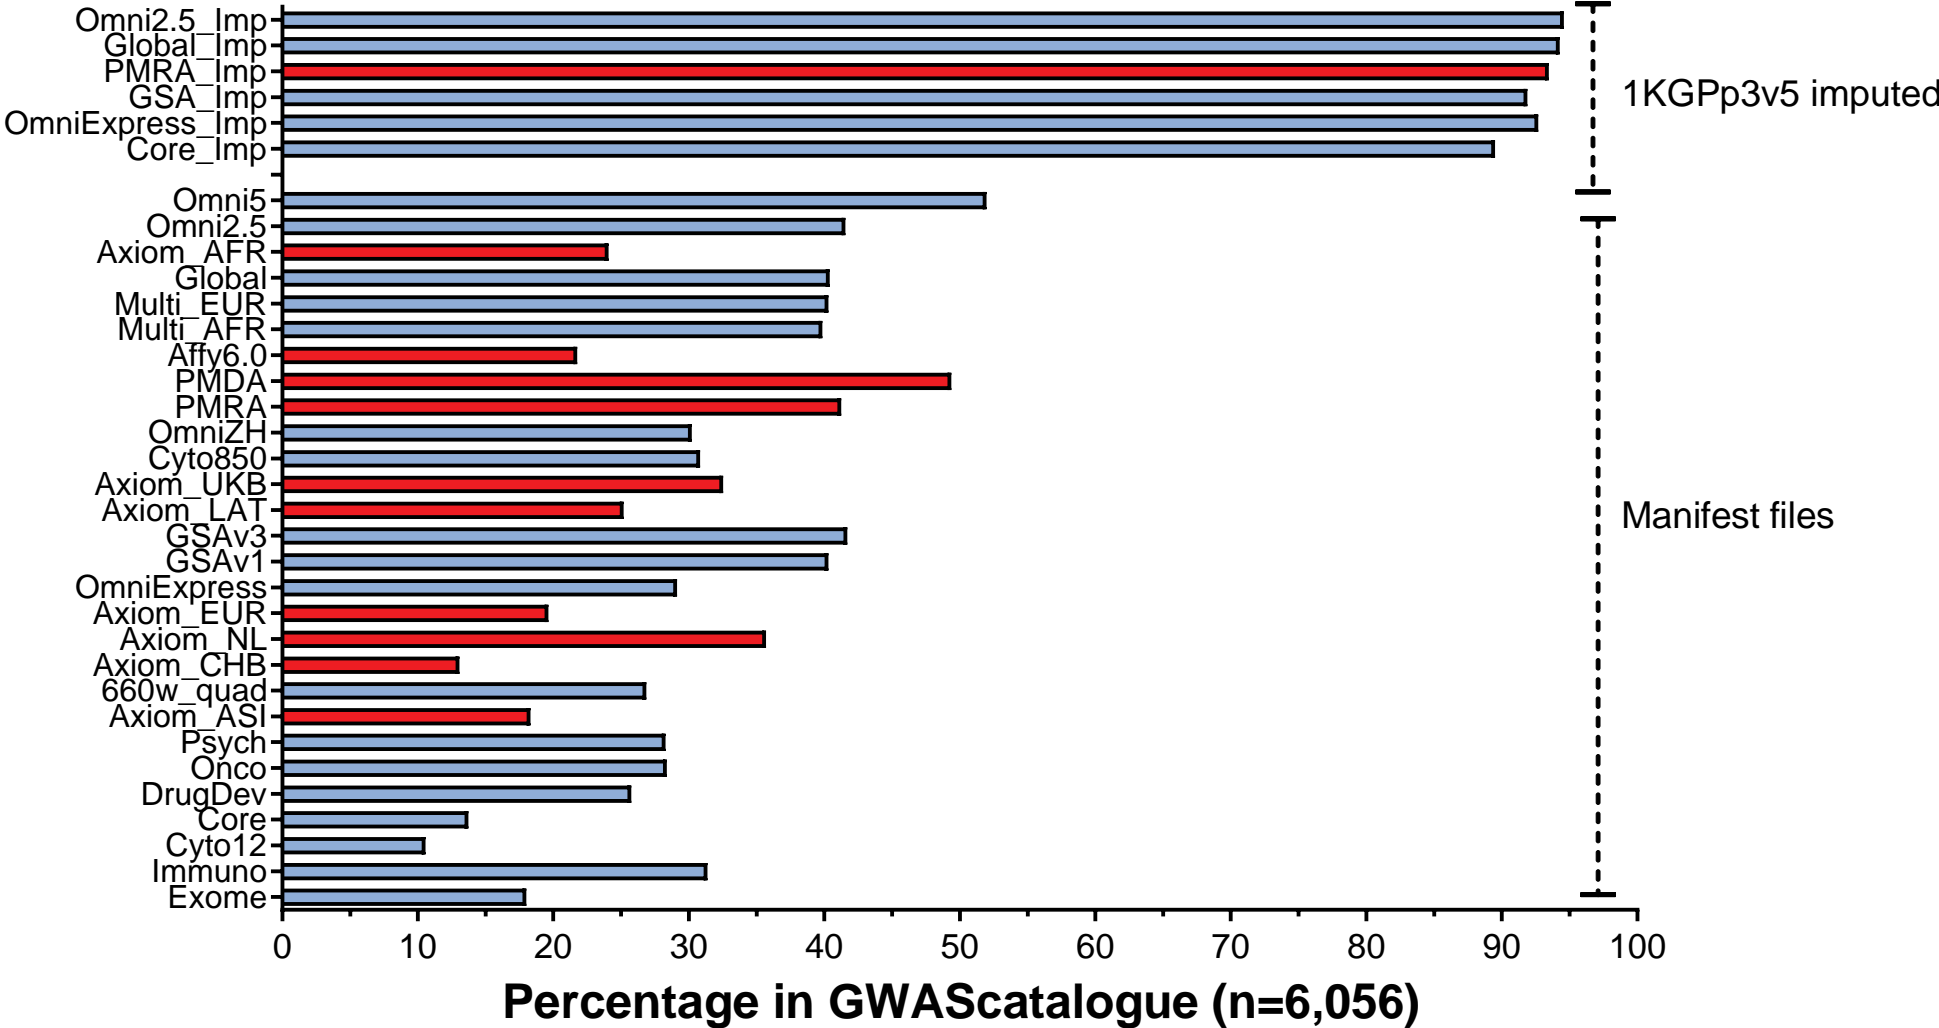

Supplement: 41431_2021_917_MOESM9_ESM.pdf [file 41431_2021_917_MOESM9_ESM.pdf]
