# Supplementary material for: A comparison of genotyping arrays
Source: PubMed Central journal article supplement (PMC8560858; doi:10.1038/s41431-021-00917-7), 2021-06-18

## G. CYP2C9

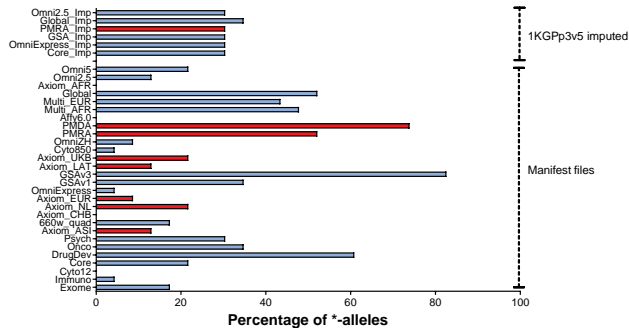

## H. CYP2D6

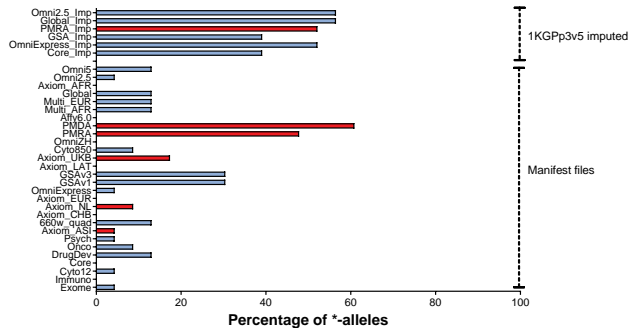

## I. CYP2E1

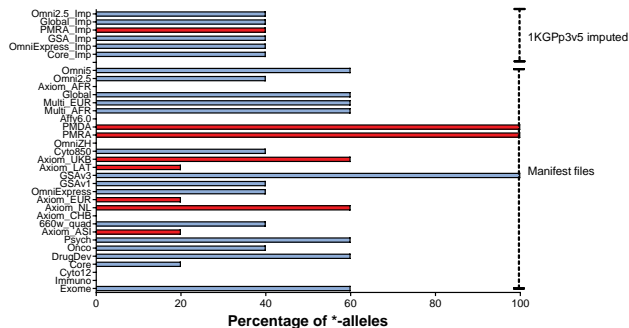

## J. CYP3A4

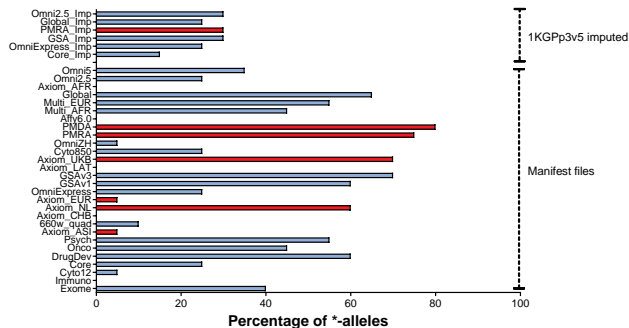

## K. CYP3A5

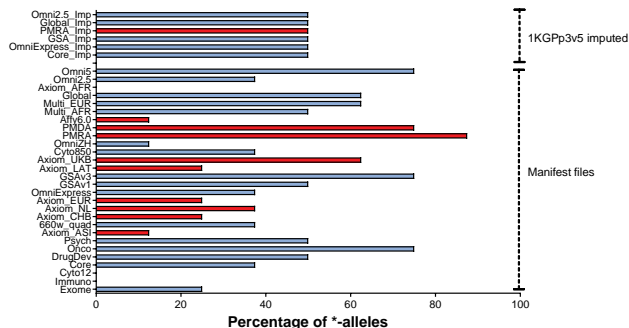

## L. CYP4F2

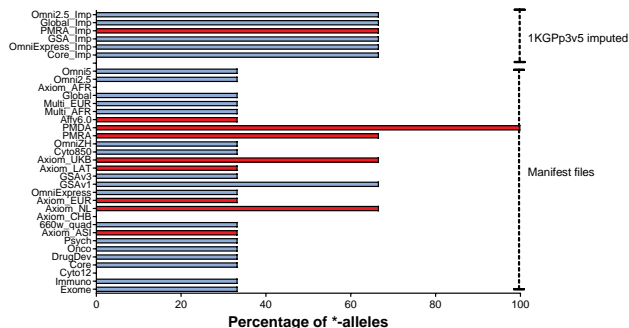

Supplement: 41431_2021_917_MOESM12_ESM.pdf [file 41431_2021_917_MOESM12_ESM.pdf]
